# Supplementary material for: Effects of Land-Related Policies on Deforestation in a Protected Area: The Case Study of Rema-Kalenga Wildlife Sanctuary, Bangladesh
Source: MDPI journal article supplement (doi:10.3390/conservation1030014), 2021-07-01
Supplement: s1 [file s1]

**Table S1.** Summary of spatial Landsat datasets used in this study.

| Year | Sensor                       | Resolution | Acquisition date  | Path/row           | ID                                               | Band combinations                     |
|------|------------------------------|------------|-------------------|--------------------|--------------------------------------------------|---------------------------------------|
| 1994 | Landsat 05 TM C1 Level-1     | 30m        | 27 November, 1994 | Path:136<br>Row:43 | LT05_L1TP_136<br>043_19941127_2<br>0170111_01_T1 | 4–3–2<br>(near-infrared<br>red green) |
| 2005 | Landsat 05 TM C1 Level-1     | 30m        | 25 November, 2005 | Path:136<br>Row:43 | LT05_L1TP_136<br>043_20051125_2<br>0161123_01_T1 | 4–3–2<br>(near-infrared<br>red green) |
| 2013 | Landsat8 OLI/TIRS C1 Level-1 | 30m        | 15 November, 2013 | Path:136<br>Row:43 | LC08_L1TP_136<br>043_20131115_2<br>0170428_01_T1 | 5–4–3<br>(near-infrared<br>red green) |
| 2018 | Landsat8 OLI/TIRS C1 Level-1 | 30m        | 29 November, 2018 | Path:136<br>Row:43 | LC08_L1TP_136<br>043_20181129_2<br>0181211_01_T1 | 5–4–3<br>(near-infrared<br>red green) |

(Source: <http://earthexplorer.usgs.gov/>).

**Table S2.** Classification of land use and land cover (LULC).

| LULC type                        | Descriptions                                                                                                                                                                                                                         |
|----------------------------------|--------------------------------------------------------------------------------------------------------------------------------------------------------------------------------------------------------------------------------------|
| Water                            | Permanent lakes and freshwater (rivers, ponds, ditches, and streams), as well as wetlands that dry up during the dry season, intermittent ponds and water points, perennial marshy areas, and man-made dams for irrigation purposes. |
| Built-up                         | Urban built-up areas, as well as temporary or permanent settlements.                                                                                                                                                                 |
| Non-commercial agricultural area | Area of land prepared for crop production, including areas currently covered by crops, areas prepared for cultivation, deforested fallow plots, and degraded forest land.                                                            |
| Commercial agricultural area     | Orchards, groves, vineyards, nurseries, and ornamental horticultural areas, as well as confined feeding operations and other agricultural land.                                                                                      |
| Forest cover                     | Land covered with trees reaching 5 m in height, 0.5 ha in area, and a canopy cover of > 10% without other land use.                                                                                                                  |

**Table S3.** Accuracy assessment.

| Class of LULC                    | 1994              |               | 2005              |               | 2013              |               | 2018              |               |
|----------------------------------|-------------------|---------------|-------------------|---------------|-------------------|---------------|-------------------|---------------|
|                                  | Producer accuracy | User accuracy |
| Forest area                      | 100.00            | 96.42         | 100.00            | 96.42         | 92.30             | 95.00         | 100.00            | 96.42         |
| Non-commercial agricultural area | 96.30             | 83.33         | 96.30             | 88.89         | 90.47             | 91.30         | 96.30             | 93.60         |

|                              |        |       |        |       |       |       |        |       |
|------------------------------|--------|-------|--------|-------|-------|-------|--------|-------|
| Commercial agricultural area | 96.30  | 92.59 | 96.30  | 45.16 | 42.85 | 83.33 | 88.30  | 80.00 |
| Built-up area                | 100.00 | 90.90 | 100.00 | 90.90 | 91.30 | 92.31 | 100.00 | 90.90 |
| Waterbody                    | 100.00 | 57.14 | 100.00 | 57.14 | 55.55 | 42.86 | 100.00 | 57.14 |
| Overall accuracy (%)         | 91.66  |       | 94.67  |       | 91.68 |       | 92.76  |       |
| Kappa co-efficient           | 0.87   |       | 0.89   |       | 0.90  |       | 0.84   |       |

Note: 0.01–0.20 slight; 0.21–0.40 fair; 0.41–0.60 moderate; 0.61–0.80 substantial; 0.81–1.00 almost perfect.

**Table S4.** Transition matrix of LULC in Rema-Kalenga Wildlife Sanctuary (RKWS) between 1994 and 2018 (unit: hectare).

| Trends and Magnitude of LULC change in RKWS |         |              |         |              |         |              |         |              |                         |                                                                                       |                         |                                                                                       |                         |                                                                                       |
|---------------------------------------------|---------|--------------|---------|--------------|---------|--------------|---------|--------------|-------------------------|---------------------------------------------------------------------------------------|-------------------------|---------------------------------------------------------------------------------------|-------------------------|---------------------------------------------------------------------------------------|
| LULC class                                  | 1994    | Area in ha % | 2005    | Area in ha % | 2013    | Area in ha % | 2018    | Area in ha % | Change in(ha) 1994-2005 |                                                                                       | Change in(ha) 2005-2013 |                                                                                       | Change in(ha) 2013-2018 |                                                                                       |
| FA                                          | 5587.90 | 89.65        | 5885.13 | 94.42        | 5402.64 | 86.68        | 4995.78 | 80.15        | +297.23                 |   | -482.49                 |   | -406.86                 |   |
| NCAA                                        | 508.81  | 8.16         | 235.98  | 3.79         | 619.27  | 9.94         | 915.21  | 14.68        | -272.83                 |  | +383.29                 |  | +295.94                 |  |
| CAA                                         | 75.80   | 1.22         | 56.98   | 0.91         | 117.28  | 1.88         | 189.86  | 3.05         | -18.82                  |  | +60.30                  |  | +72.58                  |  |
| BA                                          | 47.85   | 0.77         | 42.19   | 0.68         | 73.40   | 1.18         | 103.29  | 1.66         | -5.66                   |  | +31.21                  |  | +29.89                  |  |
| WA                                          | 12.98   | 0.21         | 12.88   | 0.21         | 20.90   | 0.34         | 28.82   | 0.46         | -0.10                   |  | +8.02                   |  | +7.92                   |  |

Note: FA= forest and semi-natural areas; NCAA= non-commercial agricultural area; CAA= commercial agricultural area; BA= built-up area; WA= waterbody area. (+, increase; -, decrease).

**Table S5.** Annual rates of change.

| LULC class | Percentage change     |                       |                       | Annual rate of change           |                                |                                |
|------------|-----------------------|-----------------------|-----------------------|---------------------------------|--------------------------------|--------------------------------|
|            | Change in % 1994–2005 | Change in % 2005–2013 | Change in % 2013–2018 | Change in % 1994–2005 (11years) | Change in % 2005–2013 (8years) | Change in % 2013–2018 (5years) |
| FA         | +4.77                 | -7.74                 | -6.53                 | +0.43                           | -0.97                          | -1.31                          |
| NCAA       | -4.38                 | +6.15                 | +4.75                 | -0.40                           | +0.77                          | +0.95                          |
| CAA        | -0.30                 | +0.97                 | +1.16                 | -0.03                           | +0.12                          | +0.23                          |
| BA         | -0.09                 | +0.48                 | +0.48                 | -0.01                           | +0.06                          | +0.10                          |
| WA         | +0.00                 | +0.13                 | +0.13                 | 0.00                            | +0.02                          | +0.03                          |

Note: FA= forest and semi-natural areas; NCAA= non-commercial agricultural area; CAA= commercial agricultural area; BA= built-up area; WA= waterbody area. (+, increase; -, decrease). ( $df = 9 \times 2 = 21$ , and  $p < 0.013$ )

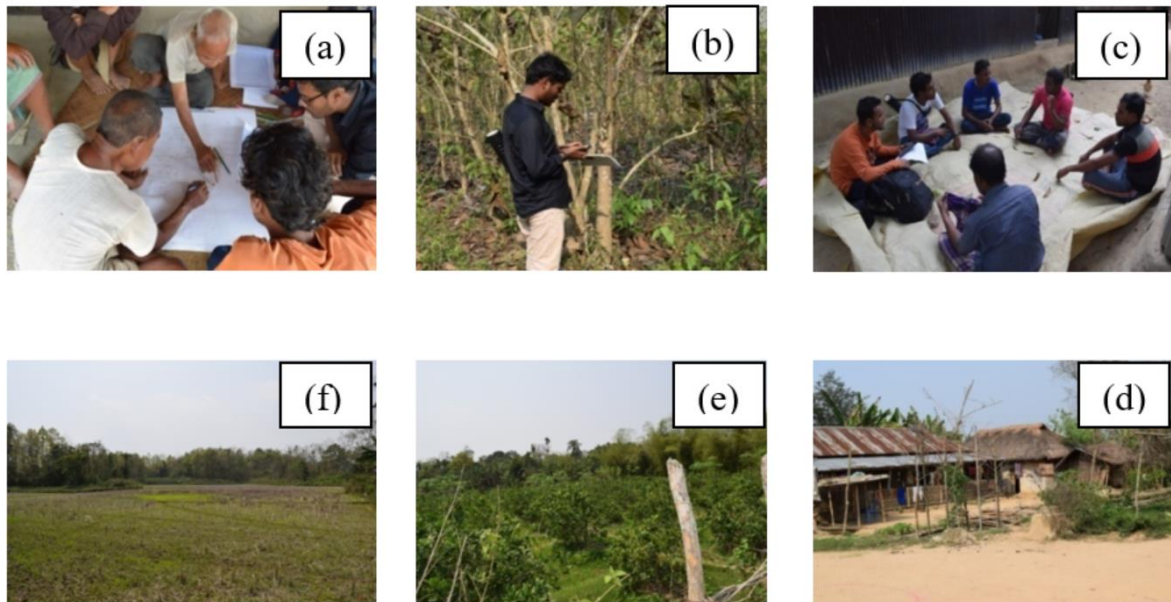

**Figure S1.** Examples of primary data sources in RKWS. Clockwise: (a) participatory mapping, (b) GPS data, (c) informal discussion with local residents, (d) settlement in the protected area (PA), (e) commercial land use, and (f) non-commercial agricultural land use.

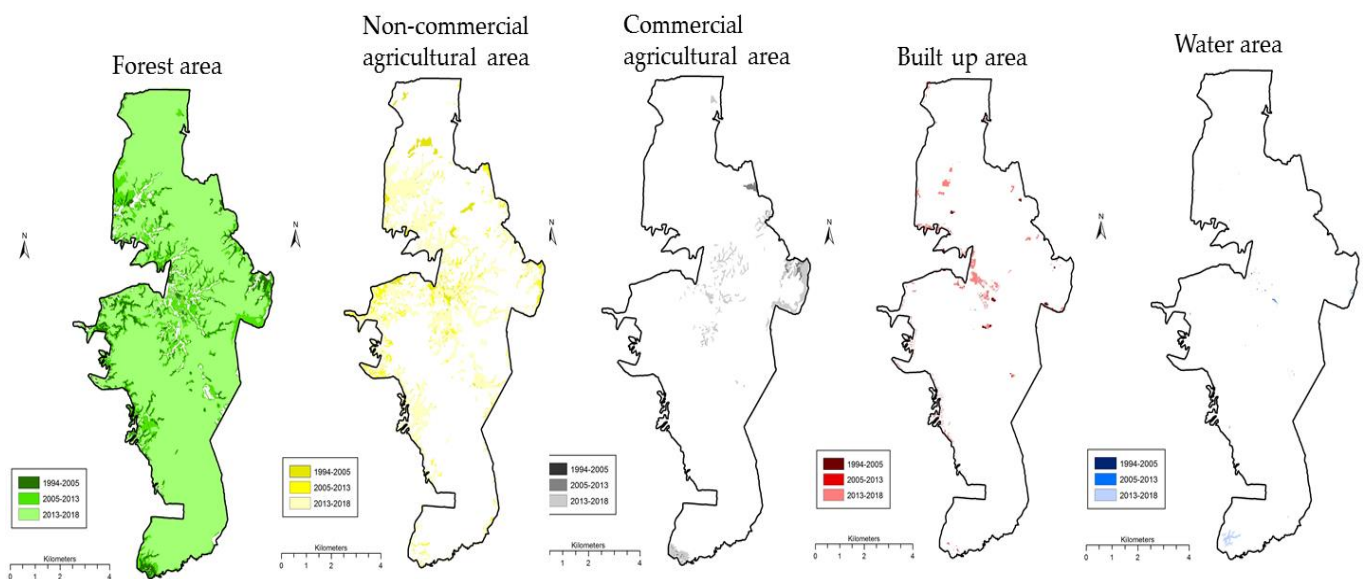

**Figure S2.** Major LULC conversions from 1994 to 2018.
